# Supplementary material for: Student centered curricular elements are associated with a healthier educational environment and lower depressive symptoms in medical students
Source: PubMed Central journal article supplement (PMC4177056; doi:10.1186/1472-6920-14-192), 2014-09-17
Supplement: 12909_2013_1019_MOESM1_ESM.pdf [file 12909_2013_1019_MOESM1_ESM.pdf]

**Appendix 1: Guide for interpretation of DREEM scores.**

| <b>DOMAIN</b>                      | <b>Score</b> | <b>Interpretation</b>                    |
|------------------------------------|--------------|------------------------------------------|
| Students' perception of learning   | 0-12         | Very poor                                |
|                                    | 13-24        | Teaching is viewed negatively            |
|                                    | 25-36        | A more positive approach                 |
|                                    | 37-48        | Teaching highly thought of               |
| Students' perception of teachers   | 0-11         | Abysmal                                  |
|                                    | 12-22        | In need of some retaining                |
|                                    | 23-33        | Moving in the right direction            |
|                                    | 34-44        | Model teachers                           |
| Students' academic self perception | 0-8          | Feeling of total failure                 |
|                                    | 9-16         | Many negative aspects                    |
|                                    | 17-24        | Feeling more on the positive side        |
|                                    | 25-32        | Confident                                |
| Students' perception of atmosphere | 0-12         | A terrible environment                   |
|                                    | 13-24        | There are many issues that need changing |
|                                    | 25-36        | A more positive atmosphere               |
|                                    | 37-48        | A good feeling overall                   |
| Students' social self perception   | 0-7          | Miserable                                |
|                                    | 8-14         | Not a nice place                         |

|                                  |       |                                          |
|----------------------------------|-------|------------------------------------------|
|                                  | 15-21 | Not too bad                              |
|                                  | 22-28 | Very good socially                       |
|                                  | 13-24 | There are many issues that need changing |
|                                  | 25-36 | A more positive atmosphere               |
|                                  | 37-48 | A good feeling overall                   |
| Students' social self perception | 0-7   | Miserable                                |
|                                  | 8-14  | Not a nice place                         |
|                                  | 15-21 | Not too bad                              |
|                                  | 22-28 | Very good socially                       |
